*Statement of authorship:* JM, KR, ON, JV, BR and SG designed the experiment. All authors contributed to the fieldwork. KR, JV and ON did the statistical analysis. KR led the writing and all authors contributed to it and accepted the final version.

*Data accessibility statement:* Should the manuscript be accepted, the data supporting the results will be archived in the University of Jyväskylä data repository JYX.

*Article title:* **Geographic mosaic of selection by avian predators on hindwing warning colour in a polymorphic aposematic moth**

*Authors:*

Katja Rönkä<sup>1,2,3\*</sup>, [katja.ronka@helsinki.fi](mailto:katja.ronka@helsinki.fi), +358445551560

Janne K. Valkonen<sup>1</sup>, [janne.k.valkonen@jyu.fi](mailto:janne.k.valkonen@jyu.fi)

Ossi Nokelainen<sup>1</sup>, [ossi.nokelainen@jyu.fi](mailto:ossi.nokelainen@jyu.fi)

Bibiana Rojas<sup>1</sup>, [bibiana.rojas@jyu.fi](mailto:bibiana.rojas@jyu.fi)

Swanne Gordon<sup>1,4</sup>, [swanne.gordon@wustl.edu](mailto:swanne.gordon@wustl.edu)

Emily Burdfield-Steel<sup>1,5</sup>, [e.r.burdfieldsteel@uva.nl](mailto:e.r.burdfieldsteel@uva.nl)

Johanna Mappes<sup>1</sup>, [johanna.mappes@jyu.fi](mailto:johanna.mappes@jyu.fi)

<sup>1</sup>*University of Jyväskylä, Department of Biological and Environmental Science, Jyväskylä, Finland*

<sup>2</sup>*Helsinki Institute of Life Sciences, University of Helsinki, Helsinki, Finland*

<sup>3</sup>*Organismal and Evolutionary Biology Research Programme, Faculty of Biological and Environmental Sciences, University of Helsinki*

<sup>4</sup>*Department of Biology, Washington University in St. Louis, St. Louis, Missouri, United States of America*

<sup>5</sup>*Institute for Biodiversity and Ecosystem Dynamics, University of Amsterdam, Amsterdam, The Netherlands*

*\*Lead Contact (Corresponding author)*

*Running title:* Geographic mosaic of selection on warning colour

*Keywords:* frequency-dependent selection, aposematism, colour polymorphism, signal variation, signal convergence, predators, predator-prey interactions, wood tiger moth, *Arctia plantaginis*

1 **Abstract**

2 Warning signals are predicted to develop signal monomorphism via positive frequency-  
3 dependent selection (+FDS) albeit many aposematic systems exhibit signal  
4 polymorphism. To understand this mismatch, we conducted a large-scale predation  
5 experiment in four locations, among which the frequencies of hindwing warning  
6 coloration of aposematic *Arctia plantaginis* differ. Here we show that selection by avian  
7 predators on warning colour is predicted by local morph frequency and predator  
8 community composition. We found +FDS to be strongest in monomorphic Scotland,  
9 and in contrast, lowest in polymorphic Finland, where different predators favour  
10 different male morphs. +FDS was also found in Georgia, where the predator community  
11 was the least diverse, whereas in the most diverse avian community in Estonia, hardly  
12 any models were attacked. Our results support the idea that spatial variation in predator  
13 and prey communities alters the strength or direction of selection on warning signals,  
14 thus facilitating a geographic mosaic of selection.

15

## 16 **Introduction**

17 The survival strategy of aposematism, wherein prey use warning signals that predators  
18 learn to associate with their unprofitability and subsequently avoid, has stimulated  
19 biological studies for centuries (Ruxton *et al.* 2018; Skelhorn *et al.* 2016; Merrill *et al.*  
20 2015; Mappes *et al.* 2005; Cott 1940; Poulton 1890; Wallace 1867). In aposematism,  
21 prey benefit from lowered costs of predator education by carrying a common signal,  
22 while predators reduce risks by not attacking defended prey. This results in selection  
23 for local similarity in warning signals, a view that has been corroborated by theoretical  
24 approaches (e.g. Aubier & Sherratt 2015; Sherratt 2008; Mallet & Joron 1999; Müller  
25 1878), laboratory experiments (e.g. Rowland *et al.* 2007; Lindström *et al.* 2001;  
26 Greenwood *et al.* 1989), and field studies (e.g. Dell'aglio *et al.* 2016; Chouteau *et al.*  
27 2016; Borer *et al.* 2010; Kapan 2001; Mallet & Barton 1989). Nevertheless, phenotypic  
28 variation and polymorphism in aposematic organisms are widespread in nature (e.g.  
29 frogs: Rojas 2017; Siddiqi *et al.* 2004; newts: Beukema *et al.* 2016; Mochida 2011;  
30 butterflies: Merrill *et al.* 2015; moths: Brakefield & Liebert 1985; bumblebees:  
31 Plowright & Owen 1980; beetles: Bocek & Bocak 2016; Brakefield 1985; locusts:  
32 Nabours 1929; myriapods: Marek & Bond 2009; nudibranchs: Winters *et al.* 2017),  
33 which requires an evolutionary explanation.

34         Given that the association between prey warning signal and defence should be  
35 learned by each generation of predators (Mappes *et al.* 2014), the benefit of signal  
36 sharing depends on how often predators encounter the signal. The encounter rate then  
37 depends on both the frequency (Heino *et al.* 1998; Müller 1879) and density (Endler &  
38 Rojas 2009; Rowland *et al.* 2007; Sword 1999; Müller 1879) of prey carrying the  
39 signal. Thus, it is expected that selection on aposematism is positively frequency-  
40 dependent (+FDS), with predators avoiding the most common warning signal in a

41 locality (Ruxton *et al.* 2018; Chouteau *et al.* 2016; Comeault & Noonan 2011; Chouteau  
42 & Angers 2011; Sherratt 2008).

43 On the other hand, several mechanisms have been proposed to counterbalance  
44 selection for signal monomorphism and facilitate warning colour polymorphism  
45 (reviewed in Briolat *et al.* 2018). For example, temporally and spatially varying  
46 interspecific interactions can result in geographically variable patterns of  
47 polymorphism (McLean & Stuart-Fox 2014), particularly when coupled with limited  
48 amounts of gene flow between differentially selected populations (e.g. Gordon *et al.*  
49 2015; Aubier & Sherratt 2015; Merilaita 2001). Often these mechanisms are thought to  
50 act simultaneously, or alternate in time or space (Stevens & Ruxton 2012; Gray &  
51 McKinnon 2007; Mallet & Joron 1999) creating a geographic mosaic of selection  
52 (Thompson 2005). Although both theoretical (e.g. Holmes *et al.* 2017; Gordon *et al.*  
53 2015; Aubier & Sherratt 2015) and experimental work (e.g. Aluthwattha *et al.* 2017;  
54 Willink *et al.* 2014) have identified several mechanisms that allow multiple morphs to  
55 persist, there is no conclusive evidence from the field and the relative importance of  
56 different selective agents is not well understood (Chouteau *et al.* 2016; Stevens &  
57 Ruxton 2012). Alas, there is little empirical evidence as to the role of predator  
58 communities on local or global morph frequencies of aposematic prey.

59 The variation in the degree of warning colour polymorphism shown by the wood  
60 tiger moth (*Arctia plantaginis*) across the western Palearctic provides an excellent  
61 system to study how warning signal variation is maintained in the wild (Hegna *et al.*  
62 2015). At a local scale, predator community structure (Nokelainen *et al.* 2014) and  
63 sexual selection (Gordon *et al.* 2015; Nokelainen *et al.* 2012) have been found to alter  
64 the direction of selection on white and yellow male morphs, but no previous studies  
65 have addressed selection on a wide geographic scale and including *A. plantaginis*

66 females, which are commonly red. We exposed artificial moths representing the three  
67 hindwing colour morphs (white, yellow, red), to local predators in a field experiment  
68 spanning across four countries, while monitoring the abundance and community  
69 structure of local predator species. We tested whether 1) selection by predators favours  
70 the locally common morph; 2) the community structure of avian predators is associated  
71 with the predation pressure on different morphs; and 3) there is variation in the direction  
72 or strength of selection among populations, matching the local morph frequencies.  
73 Variable selection pressure is one of the main candidate mechanisms for the  
74 maintenance of polymorphism. By our work, we provide the best-documented case to  
75 date of a geographic mosaic of selection on warning signals at broad spatial scales.

76

## 77 **Material and methods**

### 78 *Study system*

79 Adult wood tiger moths, *Arctia plantaginis* (Erebidae: Arctiinae; formerly *Parasemia*;  
80 see Rönkä *et al.* 2016 for classification), show conspicuous warning colours and  
81 possess a chemical defence fluid, which contains pyrazines (Burdfield-Steel *et al.*  
82 2018b; Rojas *et al.* 2017) and is a deterrent to avian predators (Burdfield-Steel *et al.*  
83 2018a; Rojas *et al.* 2017) . Their warning coloration varies throughout their Holarctic  
84 distribution, but local polymorphism is common too (Hegna *et al.* 2015). In the western  
85 Palearctic male hindwing colour is either white or yellow, or varies more continuously  
86 between yellow and red as seen in females. We selected four study locations that  
87 represent the colour variation continuum from monomorphic to polymorphic *Arctia*  
88 *plantaginis* populations in the western Palearctic (Figure 1). For the purposes of this  
89 study, we consider both sexes to belong to the white, yellow or red morph based on  
90 their hindwing colour, and simplify the continuous hindwing coloration of females and

91 Georgian males into two classes: yellow and red (categorized by human eye in 6 grades  
92 as in Lindstedt *et al.* 2011), here grades 1-2 are determined yellow and 3-6 red).  
93 Accordingly, Scotland is monomorphic with yellow males and females, Georgia is  
94 mostly red with 4.3% of males being yellow, and Estonia and Finland are polymorphic  
95 with all females caught between 2013-2015 classified as red, and males as either white  
96 or yellow (Figure 1).

97 Wood tiger moths are widespread but often low in numbers. Therefore, colour  
98 morph frequencies were calculated by population based on annual surveys using  
99 pheromone traps and netting between 2009 and 2014 in Scotland, and 2013-2015 in  
100 Georgia, Estonia and Finland. Morph frequencies for white and yellow males, and  
101 yellow or red males in Georgia, were calculated as the average frequencies from all  
102 data available. Morph frequencies for yellow and red females were based on netting  
103 data only, as the pheromone traps only lure male moths. Because our dataset was thus  
104 biased towards male moths, we corrected the morph frequencies according to a sex ratio  
105 of 45 females to 156 males, based on a mark-release-recapture study spanning two years  
106 in Central Finland (Gordon *et al.* unpublished data). This sex ratio was used, as it is  
107 likely to depict the detectability of each morph more accurately than an even 1:1 sex  
108 ratio. The higher frequency of males to females is supported by two observations: male  
109 wood tiger moths live longer and fly more actively than females, and the adult sex ratio  
110 immediately after eclosion is slightly biased towards males even in laboratory  
111 conditions (K. Suisto, personal communication). The concluding morph frequencies  
112 (Figure 1A) are consistent with museum samples (Hegna *et al.* 2015) and laboratory  
113 stocks originating from the four study populations (Central-Finland, Estonia, Scotland  
114 and Georgia).

115

116 *Predation experiment*

117 To estimate the attack risk of white, yellow and red hindwing colour morphs by local  
118 predators in the wild we used artificial moth models, resembling real *A. plantaginis*  
119 morphs. Models with plasticine (Caran D’Ache Modela 0259.009 Black) bodies  
120 attached to printed waterproof (Rite in the Rain ©, JL Darling Corporation, Tacoma,  
121 WA, USA) paper wings were prepared following methods described in Nokelainen *et*  
122 *al.* (2014). Models were constructed using pictures of one white moth hindwing and  
123 two forewings, one with a typical European pattern and another with a typical  
124 Caucasian (Georgian) pattern, which were copied and assembled in GIMP 2.8.16  
125 SOFTWARE (GNU Image manipulation program) to create six models representing  
126 the white, yellow and red morphs in Europe and Georgia (Figure 1B). A locally  
127 common forewing type was used to reduce potential novelty effect caused by the  
128 forewing pattern (Hegna & Mappes 2014). Resemblance of the artificial models to the  
129 real moths was verified by taking measurements of reflectance from the black and  
130 coloured areas of real moth wings and printed wings with a Maya2000 Pro spectrometer  
131 (Ocean Optics) using a PX-2 Pulsed Xenon Light Source (Ocean Optics) for  
132 illumination and adjusting the model colours with Gimp (2.8.16) to match the natural  
133 wing colour as closely as possible with a calibrated (HP Colour LaserJet CP2025)  
134 printer (see spectral curves of hindwing colour in Rönkä *et al.* 2018), where identical  
135 models were used). As our study focused on the hindwing coloration, all other variables  
136 such as wing size and pattern were kept constant.

137 We set up 60 predation transects across the four study populations (15 in each  
138 country) in open, semi-open and closed natural habitats where the wood tiger moth and  
139 its potential avian predators were known or presumed to occur. The predation transects  
140 were set at least 500 m apart to avoid birds having overlapping territories between the

141 transects. Along each 900 m transect 20 white, 20 yellow and 20 red artificial moth  
142 models were set individually every 15 meters using a randomized block design, so that  
143 two models of the same colour would never be next to each other. Models were pinned  
144 directly on natural vegetation, either to green leaves large enough to support their  
145 weight, or to tree trunks, as visibly as possible. All models were left in the field for a  
146 maximum of 6 days (2-6 days, 4 days on average), during the *A. plantaginis* flight  
147 season in 2014 (May 31st – July 6th in Estonia, May 26th – July 6th in Finland, June  
148 15th – July 30th in Scotland and July 12th – August 3rd in Georgia). Predation events  
149 were recorded every 24 hours except for days of heavy rain (as birds were likely not  
150 active). For practical reasons (i.e. accessibility of mountain roads and weather  
151 conditions) the protocol was modified in Georgia. The 20 white, 20 yellow and 20 red  
152 models were set every 10 m totalling up to 600 m, left in the field for 3 consecutive  
153 days (72 h), and checked only once.

154 Attacks were recorded based on imprints on the plasticine body and fractures in  
155 the wings (see Supplemental Experimental Procedures). Only clear avian attacks were  
156 included in the analyses (Supplemental Table 1). Missing and attacked models were  
157 replaced with a new model of the same colour to ensure constant morph frequency  
158 during the experiment. Excluding or keeping consecutive attacks on the replaced  
159 models in the analyses did not markedly change the outcome, reported here (Table 1)  
160 for the dataset including replaced models (4004 observations) and for the dataset  
161 including original models only (3600 observations; in Supplemental Table 2).  
162 Therefore, we kept the replaced models in for all of the analyses, as it increased the  
163 sample size.

164

165



166 *Measures of predator community*

167 To estimate the abundances of different insect-feeding birds, which are the most likely  
168 predators of wood tiger moths, we counted birds belonging to the orders Passeriformes  
169 and Piciformes (Supplemental Table 3). These counts were done once, either before or  
170 during the predation experiment, along the predation lines using a modified transect  
171 count method (see Nokelainen *et al.* 2014). Bird species observed only in one transect  
172 (out of 60), or clearly not adapted to prey on moths (e.g. crossbills), were excluded from  
173 analysis. Observations were done within 25 m from the middle of the transect in calm  
174 weather between 6 am -1 pm, when birds were most active. Shannon-Wiener diversity  
175 index (Figure 3) was calculated using R package ‘vegan’ 2.5-6 (Oksanen *et al.* 2013).

176

177 *Statistical analyses*

178 To investigate how local predator community affects the direction and strength of  
179 selection on wood tiger moth morphs, we constructed generalised linear mixed models.  
180 Because the artificial moths were presented to predators over a different number of days  
181 in each transect, the attack risk (attacked or not) within a day exposed was used as the  
182 response variable for all analyses, modelled with a binomial distribution and a logit link  
183 function. First, we tested whether predators select for wood tiger moth warning colours  
184 in a frequency-dependent manner across populations (Figure 2). For this, we used local  
185 morph frequency calculated from field monitoring data and its interaction with colour  
186 morph as the explanatory variables in Model 1 (Table 1). Transect ID, nested within  
187 country, was set as the random factor to account for the nested spatial structure of the  
188 study design.

189 To test for predator community composition effects, the dimensions of the bird  
190 count data, consisting of 12 genera, was first reduced with a principal component

191 analysis using the R function ‘princomp’. To avoid overparameterization, the main  
192 effects of the first three resulting components (explaining 44.7 %, 33.7 % and 8.5 % of  
193 the variation in predator community), and their three-way interactions with morph  
194 colour and country, were included one by one as explanatory variables in three separate  
195 GLMMs (Table 2). Country was included as an explanatory variable to test for local  
196 differences in selection and thus transect ID alone was set as a random effect to each  
197 model.

198 Statistical models were simplified using a backward stepwise deletion method  
199 based on Akaike Information Criterion. Variables were excluded one by one from the  
200 full models and the new model was accepted if the deletion reduced the AIC value more  
201 than 2 units, until only main effects or significant interactions were left in each model.  
202 All analyses were performed with R (RCoreTeam 2013) in RStudio 0.99.491 (RStudio  
203 Team 2015), using the package *lme4* (Bates *et al.* 2015).

204

## 205 **Results**

### 206 *Positive frequency-dependent selection*

207 Altogether, we observed a total of 718 bird attacks on the 4004 artificial moths. The  
208 relative attack risk of each colour morph was lower when the natural frequencies of the  
209 respective morph were higher in relation to the others (Table 1, Figure 2). Also, the  
210 morphs with intermediate local frequencies show corresponding levels of attack risk  
211 (Figure 2). This effect did not depend on colour morph itself (Table 1), as expected if  
212 the local predator avoidance depends more on local morph frequency than on morph  
213 colour.

214

215 *Predator community*

216 The attacks were not evenly distributed across countries or transects (Figure 2C).  
217 Predation pressure varied between and within countries, being highest in Scotland and  
218 lowest in Estonia (Figure 2C). Georgia had the lowest amount of insect feeding birds  
219 observed (2.1 per 100 meters) compared to Finland (2.6), Scotland (4.0) and Estonia  
220 (4.4), respectively. Georgia also had the least diverse predator community measured  
221 with Shannon-Wiener diversity index, whereas Estonia was most diverse, followed by  
222 Scotland (Figure 3). Across countries, the three most commonly observed potential  
223 predators included the common chaffinch, the willow warbler (replaced by green  
224 warbler in Georgia) and the great tit (Supplemental Table 3), the latter of which was  
225 observed to attack the artificial moths. The first three principal components (PC1, PC2  
226 and PC3) that explained 44.7 %, 33.7 % and 8.5 %, respectively, captured 87.0 % of  
227 variance in the predator community data. PC1 was dominated by Sylvidae (warblers),  
228 Fringillidae (finches) and Muscicapidae (flycatchers), which loaded in the negative end,  
229 whereas the positive end of the axis was loaded with Paridae (tits) (Figure 3). PC2 was  
230 dominated by Paridae and PC3 with Fringillidae, Muscicapidae and Troglodytidae (the  
231 Eurasian wren) (see Supplemental Table 4 for factor loadings).

232

233 *Significant association between predator community structure and selection*

234 A consecutive analysis, where the effect of predator community on the attack risk of  
235 each moth colour morph was addressed, revealed a significant three-way-interaction  
236 between moth colour, country and PC1 (Model 2, Table 2a, Figure 3). This significant  
237 interaction means that the variation in predator community structure captured by PC1  
238 is associated with predation pressure on different colour morphs, but the direction of

239 the association is different between countries (i.e. between local communities). PC2  
240 and PC3 were not significantly associated with predation pressure (Table 2C and 2D).  
241

## 242 **Discussion**

243 Our experiment is among the first experimental approaches integrating community-  
244 level interactions into the study of selection on warning signals (Aluthwattha *et al.*  
245 2017; Nokelainen *et al.* 2014; Valkonen *et al.* 2012; Mochida 2011), and the first to do  
246 so on such a large geographical scale. With a wide-ranging field experiment spanning  
247 populations varying in their degree of polymorphism, we demonstrate that local bird  
248 predators avoid locally common morphs, but also that both the strength and direction  
249 of selection on warning colour varies geographically. We found that changes in local  
250 predator communities drive geographic variation in selection despite positive  
251 frequency-dependence. Local predator-prey interactions are thus contributing to the  
252 maintenance of both geographic variation and local polymorphism in warning signals.

253 Local avian predators appear as a key in driving warning colour evolution,  
254 which can take different evolutionary trajectories over a geographic scale. Here, the  
255 predator community had a significant, but different effect to attack risk towards each  
256 morph in different countries. The first component from the principal component  
257 analysis, explaining 44.7 % of the variation in the abundances of insectivorous birds in  
258 different families, significantly affected estimated risk of attack. However, it did so  
259 differently towards each morph in the different countries. Interpreting the component  
260 loadings and model estimates (Table 2, Figure 3), the Paridae (e.g. tits) and Prunellidae  
261 (consisting of only one species, the dunnock, *Prunella modularis*) selected for different  
262 morphs in different countries. Our results corroborate the predator community effects  
263 found by Nokelainen *et al.* (2014), as we also found that in Finland the yellow morph

264 is favoured in communities characterised by Paridae whereas the white morph is  
265 favoured in communities characterised by Prunellidae. In contrast, an opposite effect  
266 was found in Scotland where the yellow morph dominates, suggesting that local  
267 predators can select for different colours in different populations.

268 Our experiment showed that across countries locally dominating colour morphs  
269 were attacked least, as predicted by +FDS. Thus, warning signal efficacy is enhanced  
270 with increasing frequency of similarly signalling individuals as predicted due to the  
271 number-dependence of predator learning and memorisation. Nonetheless, we found  
272 geographic variation in the strength of predator-induced selection. Comparison with  
273 previous experiments in those study areas that overlap (Nokelainen *et al.* 2014) also  
274 reveal temporal differences. We found high overall predation pressure in Scotland  
275 where the yellow morph was in favour compared to other study locations. Although  
276 Nokelainen *et al.* (2014) did not detect positive frequency dependency, they also found  
277 much higher overall attack rates in Scotland compared to Southern Finland and Estonia.  
278 On the other hand, Nokelainen *et al.* (2014) found that yellow males were significantly  
279 less attacked than white males in Southern Finland, whereas in our study the yellow  
280 morph tended to have more attacks than the other morphs. Interestingly, the frequency  
281 of yellow and white morphs varies in Southern Finland in a biannual cycle (Galarza *et*  
282 *al.* 2014), and the yellow morph was more common during Nokelainen *et al.*'s (2014)  
283 study, whereas in contrast the white was more common during our experiment,  
284 suggesting again that the locally most common morphs have advantage. Temporal  
285 fluctuations in local predator-prey interactions could therefore plausibly explain why  
286 estimates of predation pressure on different colour morphs conducted in different years  
287 have varied.

288 All morphs were attacked at equally low levels in Estonia, which implies spatial  
289 variation in the strength of selection or even locally relaxed natural selection on the  
290 warning signal. The low predation pressure is not explained by a low number of  
291 predators, as there were more insectivorous birds in Estonia than in any other study site  
292 (Supplemental Table 3). The bird community composition in Estonia differed from the  
293 other countries though, suggesting that the strength of selection was lower in diverse  
294 communities characterized by Sylvidae, Fringillidae, Muscicapidae, Turdidae,  
295 Troglodytidae and Oriolidae, as opposed to when Paridae (e.g. tits) characterized the  
296 community. Other properties of the predator community that can affect the strength of  
297 selection on warning signals include the relative abundance of naïve vs. experienced  
298 predators (Mappes *et al.* 2014), predators' capacity to learn many different signals  
299 (Beatty *et al.* 2004), broad generalisation between the morphs (Sherratt 2008; Balogh  
300 & Leimar 2005), conflicting selection by different predators (Nokelainen *et al.* 2014;  
301 Valkonen *et al.* 2012), and the spatial arrangement of predators in relation to prey  
302 (Endler & Rojas 2009).

303 In temperate regions, most insectivorous birds are migratory and prey  
304 population sizes are highly variable due to interseasonal weather variability. This is  
305 likely to cause variation in the relative abundances of naïve predators across the  
306 breeding season. Furthermore, local seasonal communities are continuously changing,  
307 altering the direction and/or strength of selection on warning signals (Mappes *et al.*  
308 2014). Siepielski *et al.* (2013) reviewed directional selection on phenotypes, and found  
309 that selection tends to vary more in strength than in direction between populations, with  
310 most of their examples coming from mid-latitudes in the northern hemisphere. Most  
311 experimental evidence of +FDS in the wild, however, comes from tropical systems  
312 (Comeault & Noonan 2011; Chouteau & Angers 2011; Mallet & Barton 1989), where

313 the prey and predator community composition is temporally less variable (Mittelbach  
314 *et al.* 2007). In such communities, strong +FDS can lead to very accurate mimicry  
315 between warning coloured prey, whereas in more variable conditions, higher levels of  
316 variation and polymorphism can be maintained.

317 The paradoxical maintenance of local polymorphism despite +FDS could thus  
318 be explained by spatial and temporal variation in morph survival combined with  
319 individuals migrating between the subpopulations (Gordon *et al.* 2015; McLean &  
320 Stuart-Fox 2014; Joron *et al.* 1999). Differences in the level of population isolation,  
321 and thus gene flow between them, could explain part of the geographic variation in  
322 wood tiger moth warning colours. Population genetic evidence is both for and against  
323 this hypothesis: the red-dominated Georgian subspecies *A. p. caucasica* occurring in the  
324 mountains of Caucasus is genetically isolated to some degree from the rest of the  
325 Western Palearctic samples (Rönkä *et al.* 2016; Hegna *et al.* 2015). However, although  
326 the monomorphic yellow population in Scotland is also remote, it clusters together with  
327 the Finnish and Estonian samples based on both nuclear and mitochondrial genes  
328 (Rönkä *et al.* 2016) and microsatellites (Hegna *et al.* 2015), indicating no restrictions  
329 on gene flow. The long-term co-existence of multiple morphs and the low genetic  
330 differentiation among polymorphic populations in Finland, Estonia and the Alps with  
331 yearly variation in genetic structure (Galarza *et al.* 2014) do suggest a role for gene  
332 flow along with varying predation pressure in maintaining local populations at different  
333 frequencies.

334 As recently noted by several authors (e.g. Skelhorn *et al.* 2016; Chouteau *et al.*  
335 2016; Nokelainen *et al.* 2014), more experimental work is needed to clarify predator-  
336 prey interactions at the community level in order to understand how selection is driving  
337 the evolution of warning signals in diverse natural ecosystems. Our experiment is so

338 far the most comprehensive analysis showing how spatio-temporal variation in  
339 predator-prey communities affects the maintenance of within-species variation and  
340 evolutionary pathways to biodiversity.

341

## 342 **Acknowledgements**

343 We thank Tõnis Tasane, Sally Rigg, Heli Kinnunen, Diana Abondano and Gocha  
344 Golubiani for help with the predation experiments; Otso Häärä, for counting birds in  
345 Finland; people at JYU who helped cutting out moth models; Kaisa Suisto, D.  
346 Abondano, Liisa Hämäläinen, Morgan Brain and Sini Burdillat, for rearing moths; and  
347 Jimi Kirvesoja for managing databases. The Agency of Protected Areas from the  
348 Georgian Ministry of Environment and Natural Resources Protection, provided the  
349 collection permits for Georgia; we are indebted to Khatuna Tsiklauri for help, and to  
350 the Okromelidze family for hospitality. Members of the ‘Plantaginis Journal Club’,  
351 Rose Thorogood, Øysten Opedal and two anonymous reviewers provided comments  
352 that improved an earlier version of the manuscript.

353 This study was funded by the Centre of Excellence in Biological Interactions (Project  
354 284666 to JM).

355 The authors have no conflict of interest to declare.

356

357



358 **References**

359

- 360 Aluthwattha, S.T., Harrison, R.D., Ranawana, K.B., Xu, C., Lai, R. & Chen, J.  
361 (2017). Does spatial variation in predation pressure modulate selection for  
362 aposematism? *Ecol. Evol.*, 7, 7560–7572.
- 363 Aubier, T.G. & Sherratt, T.N. (2015). Diversity in Müllerian mimicry: The optimal  
364 predator sampling strategy explains both local and regional polymorphism in  
365 prey. *Evolution*, 69, 2831–2845.
- 366 Balogh, A.C.V. & Leimar, O. (2005). Müllerian mimicry: an examination of Fisher's  
367 theory of gradual evolutionary change. *Proc. Biol. Sci.*, 272, 2269–2275.
- 368 Bates, D., Maechler, M., Bolker, B., Walker, S., Christensen, R.H.B., Singmann, H.,  
369 *et al.* (2015). lme4: Linear mixed-effects models using Eigen and S4, 2015. *R*  
370 *package version*, 1.
- 371 Beatty, C.D., Beirincx, K. & Sherratt, T.N. (2004). The evolution of müllerian  
372 mimicry in multispecies communities. *Nature*, 431, 63–66.
- 373 Beukema, W., Niecieza, A.G., Lourenço, A. & Velo-Antón, G. (2016). Colour  
374 polymorphism in *Salamandra salamandra* (Amphibia: Urodela), revealed by a  
375 lack of genetic and environmental differentiation between distinct phenotypes.  
376 *J. Zoolog. Syst. Evol. Res.*, 54, 127–136.
- 377 Bocek, M. & Bocak, L. (2016). Species limits in polymorphic mimetic Eniclases net-  
378 winged beetles from New Guinean mountains (Coleoptera, Lycidae). *ZooKeys*  
379 593: 15–35.
- 380 Borer, M., Van Noort, T., Rahier, M. & Naisbit, R.E. (2010). Positive frequency-  
381 dependent selection on warning color in Alpine leaf beetles. *Evolution*, 64,  
382 3629–3633.
- 383 Brakefield, P.M. (1985). Polymorphic Müllerian mimicry and interactions with  
384 thermal melanism in ladybirds and a soldier beetle: a hypothesis. *Biol. J. Linn.*  
385 *Soc. Lond.*, 26, 243–267.
- 386 Brakefield, P.M. & Liebert, T.G. (1985). Studies of colour polymorphism in some  
387 marginal populations of the aposematic jersey tiger moth *Callimorpha*  
388 *quadripunctaria*. *Biol. J. Linn. Soc. Lond.*, 26, 225–241.
- 389 Briolat, E.S., Burdfield-Steel, E.R., Paul, S.C., Rönkä, K.H., Seymoure, B.M.,  
390 Stankowich, T., *et al.* (2018). Diversity in warning coloration: selective  
391 paradox or the norm? *Biol. Rev. Camb. Philos. Soc.*
- 392 Burdfield-Steel, E., Brain, M., Rojas, B. & Mappes, J. (2018a). The price of safety:  
393 food deprivation in early life influences the efficacy of chemical defence in an  
394 aposematic moth. *Oikos*.
- 395 Burdfield-Steel, E., Pakkanen, H., Rojas, B., Galarza, J.A. & Mappes, J. (2018b). De  
396 novo Synthesis of Chemical Defenses in an Aposematic Moth. *J. Insect Sci.*,  
397 18.
- 398 Chouteau, M. & Angers, B. (2011). The role of predators in maintaining the  
399 geographic organization of aposematic signals. *Am. Nat.*, 178, 810–817.
- 400 Chouteau, M., Arias, M. & Joron, M. (2016). Warning signals are under positive  
401 frequency-dependent selection in nature. *Proc. Natl. Acad. Sci. U. S. A.*, 113,  
402 2164–2169.
- 403 Comeault, A.A. & Noonan, B.P. (2011). Spatial variation in the fitness of divergent  
404 aposematic phenotypes of the poison frog, *Dendrobates tinctorius*. *J. Evol.*  
405 *Biol.*, 24, 1374–1379.
- 406 Cott, H.B. (1940). Adaptive coloration in animals.
- 407 Dell'aglio, D.D., Stevens, M. & Jiggins, C.D. (2016). Avoidance of an aposematically

- 408 coloured butterfly by wild birds in a tropical forest. *Ecol. Entomol.*, 41, 627–  
409 632.
- 410 Endler, J.A. & Rojas, B. (2009). The spatial pattern of natural selection when  
411 selection depends on experience. *Am. Nat.*, 173, E62–78.
- 412 Galarza, J.A., Nokelainen, O., Ashrafi, R., Hegna, R.H. & Mappes, J. (2014).  
413 Temporal relationship between genetic and warning signal variation in the  
414 aposematic wood tiger moth (*Parasemia plantaginis*). *Mol. Ecol.*, 23, 4939–  
415 4957.
- 416 Gordon, S.P., Kokko, H. & Rojas, B. (2015). Colour polymorphism torn apart by  
417 opposing positive frequency-dependent selection, yet maintained in space.  
418 *Journal of Animal*.
- 419 Gray, S.M. & McKinnon, J.S. (2007). Linking color polymorphism maintenance and  
420 speciation. *Trends Ecol. Evol.*, 22, 71–79.
- 421 Greenwood, J.J.D., Cotton, P.A. & Wilson, D.M. (1989). Frequency-dependent  
422 selection on aposematic prey: some experiments. *Biol. J. Linn. Soc. Lond.*, 36,  
423 213–226.
- 424 Hegna, R.H., Galarza, J.A. & Mappes, J. (2015). Global phylogeography and  
425 geographical variation in warning coloration of the wood tiger moth (  
426 *Parasemia plantaginis*). *J. Biogeogr.*, 42, 1469–1481.
- 427 Hegna, R.H. & Mappes, J. (2014). Influences of geographic differentiation in the  
428 forewing warning signal of the wood tiger moth in Alaska. *Evol. Ecol.*
- 429 Heino, M., Metz, J.A. & Kaitala, V. (1998). The enigma of frequency-dependent  
430 selection. *Trends Ecol. Evol.*, 13, 367–370.
- 431 Holmes, I.A., Grundler, M.R. & Davis Rabosky, A.R. (2017). Predator Perspective  
432 Drives Geographic Variation in Frequency-Dependent Polymorphism. *Am.*  
433 *Nat.*, 190, E78–E93.
- 434 Joron, M., Wynne, I.R., Lamas, G. & Mallet, J. (1999). Variable Selection and the  
435 Coexistence of Multiple mimetic forms of the Butterfly *Heliconius numata*.  
436 *Evol. Ecol.*, 13, 721–754.
- 437 Kapan, D.D. (2001). Three-butterfly system provides a field test of müllerian  
438 mimicry. *Nature*, 409, 338–340.
- 439 Lindstedt, C., Eager, H., Ihalainen, E., Kahilainen, A., Stevens, M. & Mappes, J.  
440 (2011). Direction and strength of selection by predators for the color of the  
441 aposematic wood tiger moth. *Behav. Ecol.*, 22, 580–587.
- 442 Lindström, L., Alatalo, R.V., Lyytinen, A. & Mappes, J. (2001). Strong antiapostatic  
443 selection against novel rare aposematic prey. *Proc. Natl. Acad. Sci. U. S. A.*,  
444 98, 9181–9184.
- 445 Mallet, J. & Barton, N.H. (1989). Strong natural selection in a warning-color hybrid  
446 zone. *Evolution*, 43, 421–431.
- 447 Mallet, J. & Joron, M. (1999). Evolution of Diversity in Warning Color and Mimicry:  
448 Polymorphisms, Shifting Balance, and Speciation. *Annu. Rev. Ecol. Syst.*, 30,  
449 201–233.
- 450 Mappes, J., Kokko, H., Ojala, K. & Lindström, L. (2014). Seasonal changes in  
451 predator community switch the direction of selection for prey defences. *Nat.*  
452 *Commun.*, 5, 5016.
- 453 Mappes, J., Marples, N. & Endler, J.A. (2005). The complex business of survival by  
454 aposematism. *Trends Ecol. Evol.*, 20, 598–603.
- 455 Marek, P.E. & Bond, J.E. (2009). A Müllerian mimicry ring in Appalachian  
456 millipedes. *Proc. Natl. Acad. Sci. U. S. A.*, 106, 9755–9760.
- 457 McLean, C.A. & Stuart-Fox, D. (2014). Geographic variation in animal colour

- 458 polymorphisms and its role in speciation. *Biol. Rev. Camb. Philos. Soc.*  
459 Merilaita, S. (2001). Habitat heterogeneity, predation and gene flow: colour  
460 polymorphism in the isopod, *Idotea baltica*. *Evol. Ecol.*, 15, 103–116.  
461 Merrill, R.M., Dasmahapatra, K.K., Davey, J.W., Dell’Aglia, D.D., Hanly, J.J.,  
462 Huber, B., *et al.* (2015). The diversification of *Heliconius* butterflies: what  
463 have we learned in 150 years? *J. Evol. Biol.*, 28, 1417–1438.  
464 Mittelbach, G.G., Schemske, D.W., Cornell, H.V., Allen, A.P., Brown, J.M., Bush,  
465 M.B., *et al.* (2007). Evolution and the latitudinal diversity gradient: speciation,  
466 extinction and biogeography. *Ecol. Lett.*, 10, 315–331.  
467 Mochida, K. (2011). Combination of local selection pressures drives diversity in  
468 aposematic signals. *Evol. Ecol.*, 25, 1017.  
469 Müller, F. (1878). *Ueber die Vortheile der Mimicry bei Schmetterlingen*.  
470 Müller, F. (1879). Ituna and Thyridia: a remarkable case of mimicry in butterflies.  
471 *Trans. Entomol. Soc. Lond*, 1879, 20–29.  
472 Nabours, R.K. (1929). The Genetics of the Tettigidae (Grouse Locusts). In: *The*  
473 *Genetics of the Tettigidae (Grouse Locusts)* (ed. Nabours, R.K.). Springer  
474 Netherlands, Dordrecht, pp. 27–100.  
475 Nokelainen, O., Hegna, R.H., Reudler, J.H., Lindstedt, C. & Mappes, J. (2012).  
476 Trade-off between warning signal efficacy and mating success in the wood  
477 tiger moth. *Proc. Biol. Sci.*, 279, 257–265.  
478 Nokelainen, O., Valkonen, J., Lindstedt, C. & Mappes, J. (2014). Changes in predator  
479 community structure shifts the efficacy of two warning signals in Arctiid  
480 moths. *J. Anim. Ecol.*, 83, 598–605.  
481 Oksanen, J., Blanchet, F.G., Kindt, R., Legendre, P., Minchin, P.R., O’hara, R.B., *et*  
482 *al.* (2013). *Vegan: Community Ecology Package*. R package version 2.5-6.  
483 <https://CRAN.R-project.org/package=vegan>  
484 Plowright, R.C. & Owen, R.E. (1980). THE EVOLUTIONARY SIGNIFICANCE OF  
485 BUMBLE BEE COLOR PATTERNS: A MIMETIC INTERPRETATION.  
486 *Evolution*, 34, 622–637.  
487 Poulton, E.B. (1890). *The colours of animals: their meaning and use, especially*  
488 *considered in the case of insects*. Kegan Paul, Trench, Trubner.  
489 RCoreTeam. (2013). *R: A language and environment for statistical computing*. R  
490 Foundation for Statistical Computing, Vienna, Austria.  
491 Rojas, B. (2017). Behavioural, ecological, and evolutionary aspects of diversity in  
492 frog colour patterns. *Biol. Rev. Camb. Philos. Soc.*, 92, 1059–1080.  
493 Rojas, B., Burdfield-Steel, E., Pakkanen, H., Suisto, K., Maczka, M., Schulz, S., *et al.*  
494 (2017). How to fight multiple enemies: target-specific chemical defences in an  
495 aposematic moth. *Proc. Roy. Soc. B*, 284, 20171424.  
496 Rönkä, K., De Pasqual, C., Mappes, J., Gordon, S. & Rojas, B. (2018). Colour alone  
497 matters: no predator generalization among morphs of an aposematic moth.  
498 *Anim. Behav.*  
499 Rönkä, K., Mappes, J., Kaila, L. & Wahlberg, N. (2016). Putting Parasemia in its  
500 phylogenetic place: a molecular analysis of the subtribe Arctiina (Lepidoptera)  
501 : Molecular phylogeny of Arctiina. *Syst. Entomol.*, 41, 844–853.  
502 Rowland, H.M., Ihalainen, E., Lindström, L., Mappes, J. & Speed, M.P. (2007). Co-  
503 mimics have a mutualistic relationship despite unequal defences. *Nature*, 448,  
504 64–67.  
505 RStudio Team. (2015). *RStudio: integrated development for R* (Version 0.99.441)  
506 [Computer software]. Boston, MA. Available from <http://www.rstudio.org/>.  
507 Ruxton, G.D., Allen, W.L., Sherratt, T.N. & Speed, M.P. (2018). *Avoiding Attack:*

- 508           *The Evolutionary Ecology of Crypsis, Aposematism, and Mimicry*. Oxford  
509           University Press.
- 510 Sherratt, T.N. (2008). The evolution of Müllerian mimicry. *Naturwissenschaften*, 95,  
511           681–695.
- 512 Siddiqi, A., Cronin, T.W., Loew, E.R., Vorobyev, M. & Summers, K. (2004).  
513           Interspecific and intraspecific views of color signals in the strawberry poison  
514           frog *Dendrobates pumilio*. *J. Exp. Biol.*, 207, 2471–2485.
- 515 Siepielski, A.M., Gotanda, K.M., Morrissey, M.B., Diamond, S.E., DiBattista, J.D. &  
516           Carlson, S.M. (2013). The spatial patterns of directional phenotypic selection.  
517           *Ecol. Lett.*, 16, 1382–1392.
- 518 Skelhorn, J., Halpin, C.G. & Rowe, C. (2016). Learning about aposematic prey.  
519           *Behav. Ecol.*, 27, 955–964.
- 520 Stevens, M. & Ruxton, G.D. (2012). Linking the evolution and form of warning  
521           coloration in nature. *Proc. Biol. Sci.*, 279, 417–426.
- 522 Sword, G.A. (1999). Density-dependent warning coloration. *Nature*, 397, 217–217.
- 523 Thompson, J. N. (2005). *The geographic mosaic of coevolution*. University of  
524           Chicago Press.
- 525 Valkonen, J.K., Nokelainen, O., Niskanen, M., Kilpimaa, J., Björklund, M. &  
526           Mappes, J. (2012). Variation in predator species abundance can cause variable  
527           selection pressure on warning signaling prey. *Ecol. Evol.*, 2, 1971–1976.
- 528 Wallace, A. (1867). *Proceedings of the Entomological Society of London* March 4th,  
529           Ixxx–Ixxxi.
- 530 Willink, B., García-Rodríguez, A., Bolaños, F. & Pröhl, H. (2014). The interplay  
531           between multiple predators and prey colour divergence. *Biol. J. Linn. Soc.*  
532           *Lond.*, 113, 580–589.
- 533 Winters, A.E., Green, N.F., Wilson, N.G., How, M.J., Garson, M.J., Marshall, N.J., *et*  
534           *al.* (2017). Stabilizing selection on individual pattern elements of aposematic  
535           signals. *Proc. Biol. Sci.*, 284.
- 536

537 **Figures**

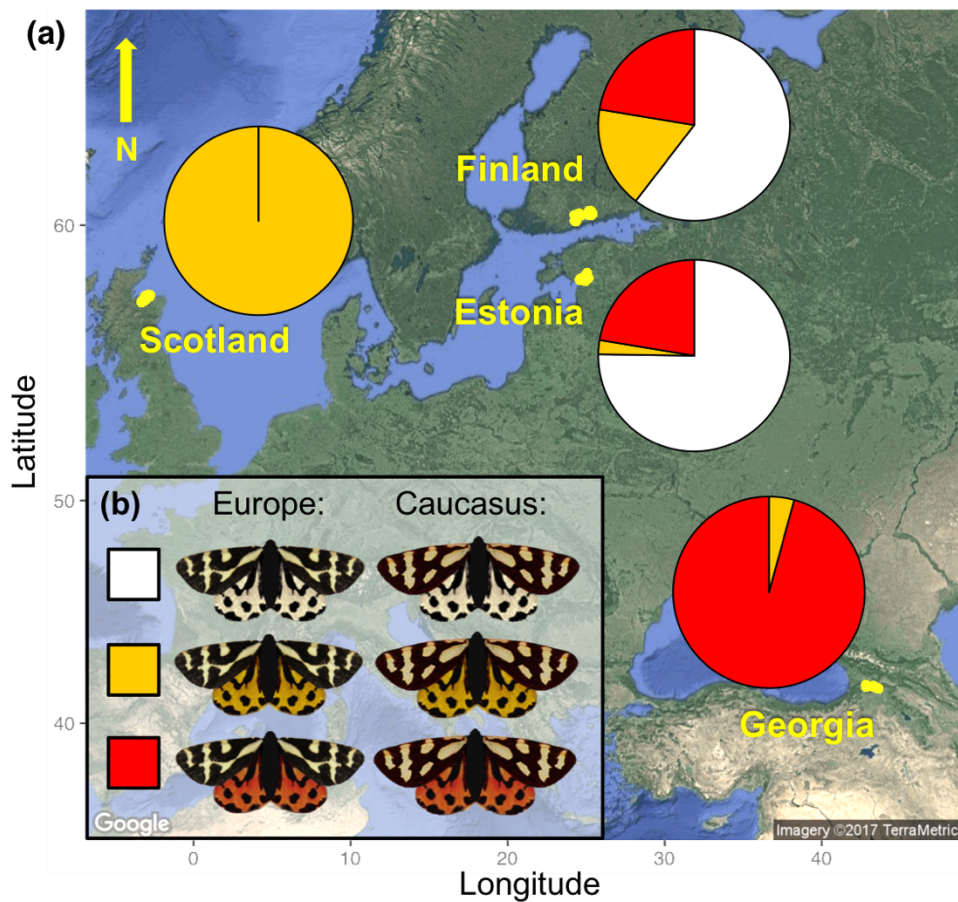

538

539

540 **Figure 1.** (a) Study populations and local morph frequencies and (b) moth models used  
541 in Europe and Georgia representing a local forewing pattern and white, yellow or red  
542 hindwing morph. At the monomorphic end of the monomorphic-polymorphic  
543 continuum in Scotland, both sexes have yellow hindwing coloration. In Georgia red is  
544 the dominating hindwing colour, but male coloration varies continuously towards  
545 yellow. In Estonia, white hindwing colour dominates, as the males are almost  
546 exclusively white and females red. In Southern Finland all three colour morphs are  
547 present (white and yellow male morphs and females vary continuously from yellow to  
548 red).

549

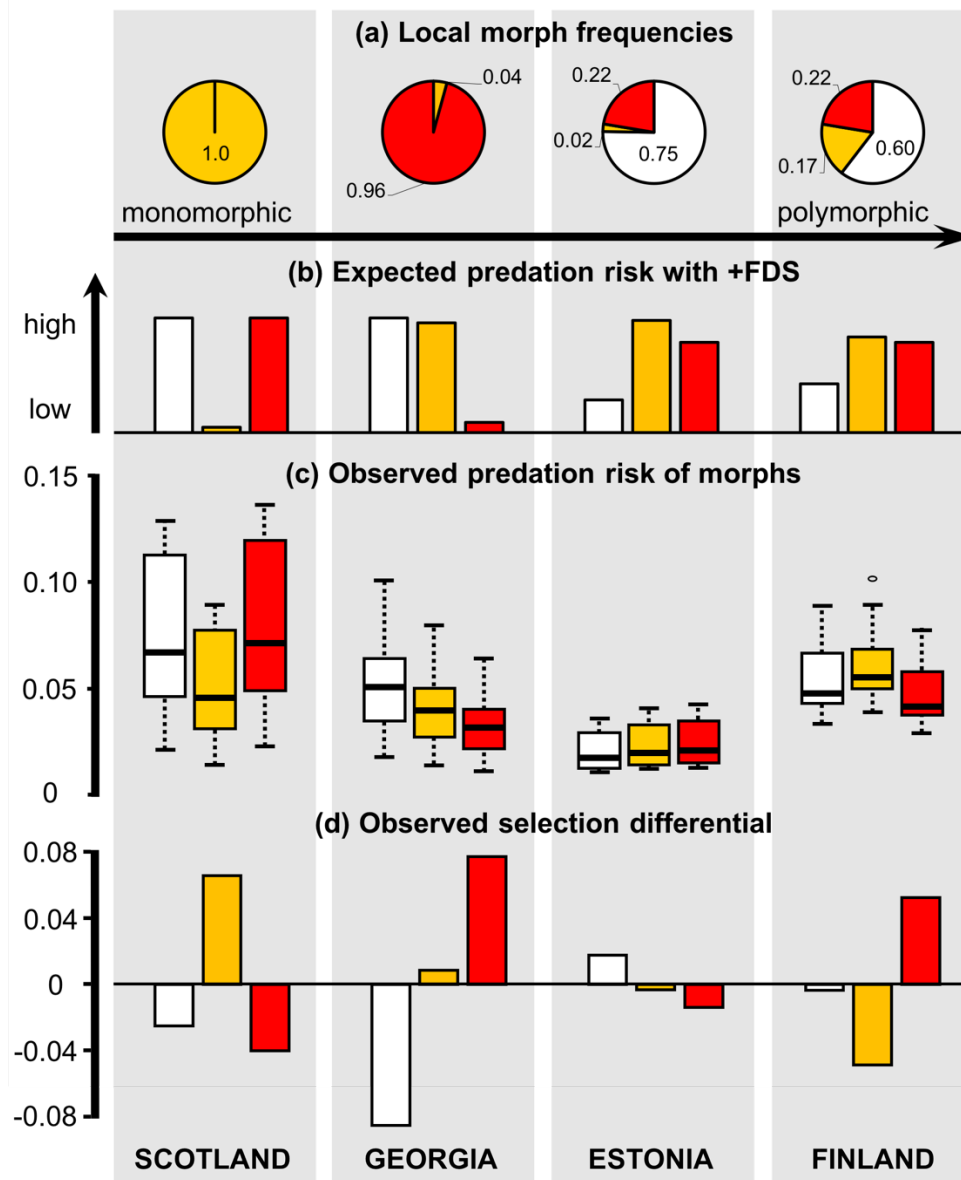

550

551

552 **Figure 2.** Wood tiger moth morph frequencies compared to expected and observed  
 553 predation risk and selection differential by country. (a) Local morph frequencies  
 554 calculated from annual monitoring data, (b) expected attack risk according to the +FDS  
 555 hypothesis, where each morph is attacked according to its local frequency, (c) observed  
 556 predation illustrated as GLMM estimates of daily attack risk for each morph by country  
 557 and (d) observed difference in attacks per morph compared to a situation where all  
 558 morphs would be attacked equally. Morph colours (white, yellow, red) as in Figure 1.

559

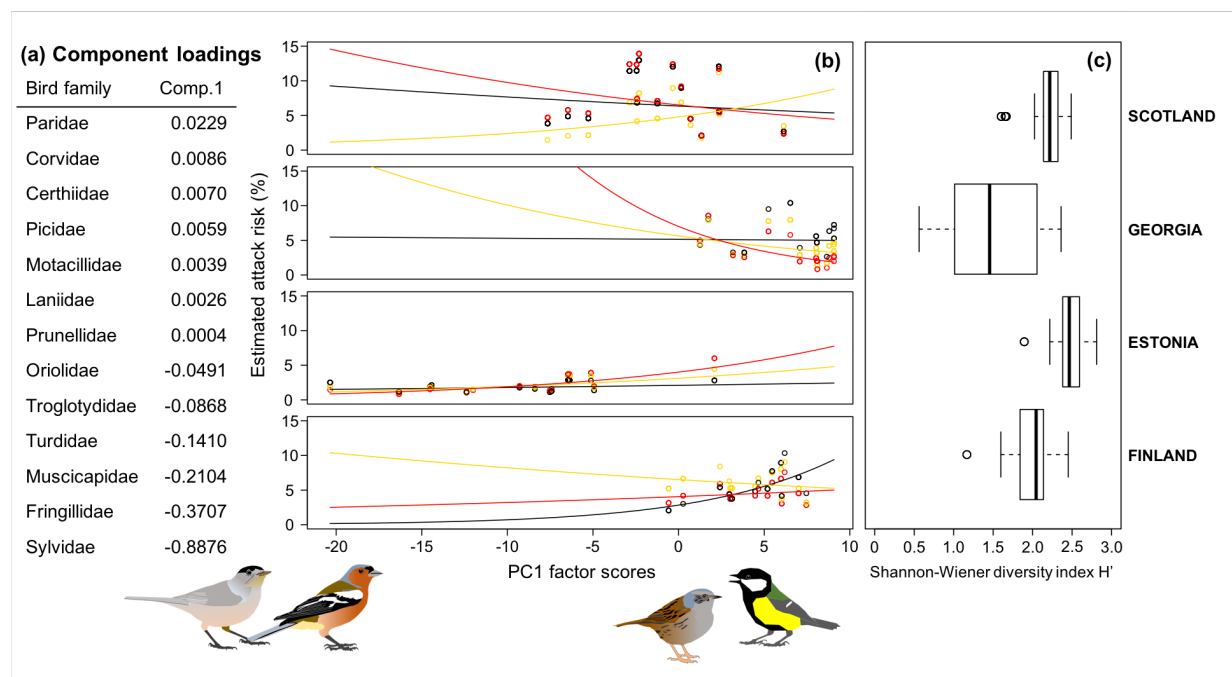

560

561 **Figure 3.** Community composition and diversity of insectivorous birds per population.

562 Factor scores and loading of the first principal component describing 44.7% of the total

563 variation of bird communities across countries. Panel (a) family level component

564 loadings, panel (b) the three-way interaction effect of predator community on estimated

565 attack risk of different colour morphs (black line corresponds to the white morph) at

566 each transect illustrated by population, panel (c) Shannon-Wiener diversity indexes

567 calculated per transect and plotted by population. The x-axes on both panels b and c

568 represent factor scores for principal component 1.

569

570 **Tables**

571 **Table 1.** Positive frequency-dependency of the estimated attack risk. (a) The model  
 572 including only main effects of morph frequency and morph colour (underlined) was  
 573 selected because the reduction in AIC value compared to a full model with both main  
 574 effects and interaction between morph frequency and colour is higher than 2 ( $\Delta$  AIC =  
 575 3.4). (b) Estimates of the best-fit model (Model 1a). Values of significance level  $<0.05$   
 576 are bolded.  $\Delta$  df denotes change in model degrees of freedom.

577

| <b>(a) Model selection</b>      | $\Delta$ df | LRT    | Pr(Chi) | model AIC |
|---------------------------------|-------------|--------|---------|-----------|
| colour * morph frequency        |             |        |         | 3957.0    |
| <u>colour + morph frequency</u> | 2           | 0.1949 | 0.907   | 3953.2    |

The asterisk (\*) denotes both main effects and interaction terms used.

578

**(b) Model 1a**

| <b>Random effects</b>   | <b>Variance</b> | <b>SD</b> |                |                  |
|-------------------------|-----------------|-----------|----------------|------------------|
| transect within country | 0.3315          | 0.5758    |                |                  |
| country                 | 0.1633          | 0.4041    |                |                  |
| <b>Fixed effects</b>    | <b>Estimate</b> | <b>SE</b> | <b>Z-value</b> | <b>p-value</b>   |
| (Intercept): colour[w]  | -3.0433         | 0.2275    | -13.376        | <b>&lt;0.001</b> |
| colour[y]               | -0.0923         | 0.0940    | -0.982         | 0.3259           |
| colour[r]               | -0.0841         | 0.0925    | -0.909         | 0.3633           |
| morph frequency         | -0.3728         | 0.1071    | -3.481         | <b>0.0005</b>    |

579



580 **Table 2.** The interaction effect of predator community and location (country, C) on the  
 581 attack risk towards the wood tiger moth colour morphs. (a) Model selection starting  
 582 from the main effects, interactions and a three-way interaction between principal  
 583 component 1 (PC1), country (C) and colour morph (colour) as the explanatory  
 584 variables, with the best-fit model underlined. (b) Estimates from the selected model  
 585 (Model 2) with a significant three-way interaction of principal component 1, colour  
 586 morph and country. (c) Model selection for principal component 2. Principal  
 587 component 2 had no significant effects on attack risk, and thus estimates are not shown.  
 588 (d) Model selection for principal component 3. Principal component 3 had no  
 589 significant effects on attack risk, and thus estimates are not shown. Values of  
 590 significance level <0.05 are bolded.  $\Delta$  df denotes change in model degrees of freedom.  
 591

| (a) Model selection with PC1           | $\Delta$ df | LRT   | Pr(Chi)      | model AIC |
|----------------------------------------|-------------|-------|--------------|-----------|
| <u>PC1*colour*C</u>                    |             |       |              | 3956.1    |
| PC1+colour+C+PC1:colour+PC1:C+colour:C | 6           | 14.35 | <b>0.026</b> | 3958.4    |

592 The asterisk (\*) denotes both main effects and interaction terms used.

**(b) Model 2**

| Random effects                     | Variance | SD     |         |                       |
|------------------------------------|----------|--------|---------|-----------------------|
| transect                           | 0.2779   | 0.5272 |         |                       |
| Fixed effects                      | Estimate | SE     | Z-value | p-value <sup>1)</sup> |
| (Intercept): colour[w], C[Finland] | -3.556   | 0.438  | -8.126  | < <b>0.001</b>        |
| colour[y]                          | 0.869    | 0.407  | 2.134   | <b>0.033</b>          |
| colour[r]                          | 0.370    | 0.440  | 0.840   | 0.401                 |
| PC1                                | 0.139    | 0.088  | 1.590   | 0.112                 |
| C[Estonia]                         | -0.309   | 0.621  | -0.498  | 0.619                 |
| C[Georgia]                         | 0.618    | 0.647  | 0.955   | 0.340                 |
| C[Scotland]                        | 0.843    | 0.477  | 1.766   | 0.077                 |
| PC1 : colour[y]                    | -0.164   | 0.083  | -1.989  | <b>0.047</b>          |
| PC1 : colour[r]                    | -0.115   | 0.089  | -1.299  | 0.194                 |

|                               |        |       |        |              |
|-------------------------------|--------|-------|--------|--------------|
| C[Estonia] : colour[y]        | -0.463 | 0.606 | -0.765 | 0.444        |
| C[Estonia] : colour[r]        | 0.297  | 0.618 | 0.481  | 0.631        |
| C[Georgia] : colour[y]        | -0.773 | 0.592 | -1.306 | 0.192        |
| C[Georgia] : colour[r]        | -0.041 | 0.616 | -0.067 | 0.947        |
| C[Scotland] : colour[y]       | -1.169 | 0.445 | -2.624 | <b>0.009</b> |
| C[Scotland] : colour[r]       | -0.345 | 0.472 | -0.730 | 0.466        |
| PC1 : C[Estonia]              | -0.123 | 0.097 | -1.273 | 0.203        |
| PC1 : C[Georgia]              | -0.143 | 0.111 | -1.280 | 0.201        |
| PC1 : C[Scotland]             | -0.159 | 0.103 | -0.551 | 0.121        |
| C[Estonia] : PC1 : colour[y]  | 0.197  | 0.093 | 2.115  | <b>0.035</b> |
| C[Estonia] : PC1 : colour[r]  | 0.176  | 0.099 | 1.781  | <b>0.075</b> |
| C[Georgia] : PC1 : colour[y]  | 0.105  | 0.105 | 0.991  | 0.322        |
| C[Georgia] : PC1 : colour[r]  | -0.033 | 0.113 | -0.294 | 0.769        |
| C[Scotland] : PC1 : colour[y] | 0.256  | 0.100 | 2.550  | <b>0.011</b> |
| C[Scotland] : PC1 : colour[r] | 0.091  | 0.102 | 0.892  | 0.372        |

593

| <b>(c) Model selection with PC2</b>     | <b>Δ df</b> | <b>LRT</b> | <b>Pr(Chi)</b> | <b>model AIC</b> |
|-----------------------------------------|-------------|------------|----------------|------------------|
| PC2*colour*country                      |             |            |                | 3962.6           |
| PC2+colour+C+PC2:colour+PC2:C+colour:C  | 6           | 4.413      | 0.621          | 3955.0           |
| <u>PC2+colour+C+PC2:colour+colour:C</u> | 3           | 3.334      | 0.343          | 3952.4           |
| PC2+colour+C+colour:C                   | 2           | 3.923      | 0.141          | 3952.3           |
| PC2+colour+C                            | 6           | 16.737     | <b>0.010</b>   | 3957.0           |
| colour*country                          | 1           | 0.545      | 0.460          | 3950.8           |
| <b>(d) Model selection with PC3</b>     | <b>Δ df</b> | <b>LRT</b> | <b>Pr(Chi)</b> | <b>model AIC</b> |
| PC3*colour*country                      |             |            |                | 3963.6           |
| PC3+colour+C+PC3:colour+PC3:C+colour:C  | 6           | 5.190      | 0.520          | 3956.8           |
| <u>PC3+colour+C+PC3:colour+colour:C</u> | 3           | 1.400      | 0.706          | 3952.2           |
| PC3+colour+C+colour:C                   | 2           | 4.599      | 0.100          | 3952.8           |
| PC3+colour+C                            | 6           | 16.726     | <b>0.010</b>   | 3957.5           |
| colour*country                          | 1           | 0.034      | 0.854          | 3950.8           |

594
